# Supplementary material for: A global investigation of gene deletion strains that affect premature stop codon bypass in yeast, Saccharomyces cerevisiae
Source: Royal Society of Chemistry journal article supplement (doi:10.1039/c3mb70501c), 2014-02-10
Supplement: c3mb70501c1.pdf [file c3mb70501c1.pdf]

**List of designed primes for gene knock-out in yeast**

| <b>Primer name</b> | <b>Primer sequence (5'-3')</b>                                                        | <b>description</b>                                                 |
|--------------------|---------------------------------------------------------------------------------------|--------------------------------------------------------------------|
| BSC2-F             | ATTGTCTTTTTTCTTCCTTCCTGCCAGGCATCTGCATCCATTATTGCCTT<br>TAGTTACACACATACGATTTAGGTGACAC   | Upstream homology attached to forward NAT primer, gene knock out   |
| BSC2-R             | TTCTGTAGCAATAAGTGTTCTTAGCAGTGGCGTTGCGTTGCCTTGACCTT<br>GATTATCAATAATACGACTCACTATAGGGAG | Downstream homology attached to reverse NAT primer, gene knock out |
| BSC2-Con           | AAGCCAGGAAGTTAGCGCCGGG                                                                | Confirmational analysis for gene replacement                       |
| OLA1-F             | TAGCTTTTTGTGTTACTTCTAGTATCCGTAAAAACAATCAAATAAATAGC<br>ACTGTAAAACCACATACGATTTAGGTGACAC | Upstream homology attached to forward NAT primer, gene knock out   |
| OLA1-R             | ATGATGATATATAGTAGGGAACATAACCAATAAAGAAAAGTCAACTT<br>TAGTGCACGAAAAATACGACTCACTATAGGGAG  | Downstream homology attached to reverse NAT primer, gene knock out |
| OLA1-Con           | GGCAGAATGCAGTTGTTGCGTG                                                                | Confirmational analysis for gene replacement                       |
| YNL040W-F          | GTGACGCATATCGACGAAAGCACACAACAGCGTCAAAAATTGATTA<br>AGGTAAGTTATCCACATACGATTTAGGTGACAC   | Upstream homology attached to forward NAT primer, gene knock out   |
| YNL040W-R          | TCACGATAAATACCTACCATTATGTATACAACAAATCTGCGTATACAAAT<br>GGCACATTTCAATACGACTCACTATAGGGAG | Downstream homology attached to reverse NAT primer, gene knock out |
| YNL040W-Con        | AGGGTAGTAACGTACGTGGACGAA                                                              | Confirmational analysis for gene replacement                       |
| Nat-Con            | TCCAGTGCCTCGATGGCCTCGGCG                                                              | Confirmational analysis for gene replacement                       |
| PGK1-F             | CAGACCATTCTTGCCATCT                                                                   | house keeping gene, qRT-PCR analysis                               |
| PGK1-R             | CGAAGATGGAGTCACCGATT                                                                  | house keeping gene, qRT-PCR analysis                               |
| LacZ-F             | TTGAAAATGGTCTGCTGCTG                                                                  | Reporter gene, qRT-PCR analysis                                    |
| LacZ-R             | TATTGGCTTCATCCACCACA                                                                  | Reporter gene, qRT-PCR analysis                                    |
| Ploy T             | TTTTTTTTTTTTTTTTTT                                                                    | Template for Reverse transcriptase                                 |
