# Supplementary material for: A global investigation of gene deletion strains that affect premature stop codon bypass in yeast, Saccharomyces cerevisiae
Source: Royal Society of Chemistry journal article supplement (doi:10.1039/c3mb70501c), 2014-02-10
Supplement: c3mb70501c2.pdf [file c3mb70501c2.pdf]

| Systematic Name | Standard name | Ratio of the $\beta$ -gal for UAA stop codon bypass normalized to a control strain(wt) set at 1.00 (pUKC817/pUKC815) | Ratio of the $\beta$ -gal for UGA stop codon bypass normalized to a control strain(wt) set at 1.00 (pUKC818/pUKC815) | Ratio of the $\beta$ -gal for UAG stop codon bypass normalized to a control strain(wt) set at 1.00 (pUKC819/pUKC815) | Sensitivity to Cycloheximide | Sensitivity to Paromomycin |
|-----------------|---------------|----------------------------------------------------------------------------------------------------------------------|----------------------------------------------------------------------------------------------------------------------|----------------------------------------------------------------------------------------------------------------------|------------------------------|----------------------------|
| YJR105W         | ADO1          | <b>9 ± 1.09</b>                                                                                                      | <b>11 ± 2.11</b>                                                                                                     | <b>5 ± 0.12</b>                                                                                                      | Yes                          | No                         |
| YCL025C         | AGP1          | -                                                                                                                    | -                                                                                                                    | -                                                                                                                    | yes                          | No                         |
| YDR063W         | AIM7          | -                                                                                                                    | -                                                                                                                    | -                                                                                                                    | No                           | No                         |
| YPR049C         | ATG11         | -                                                                                                                    | -                                                                                                                    | -                                                                                                                    | No                           | Yes                        |
| YJR148W         | BAT2          | -                                                                                                                    | -                                                                                                                    | -                                                                                                                    | No                           | No                         |
| YER167W         | BCK2          | -                                                                                                                    | -                                                                                                                    | -                                                                                                                    | Yes                          | No                         |
| YDR099W         | BMH2          | -                                                                                                                    | -                                                                                                                    | -                                                                                                                    | Yes                          | No                         |
| YDR275W         | BSC2          | -                                                                                                                    | -                                                                                                                    | -                                                                                                                    | Yes                          | Yes                        |
| YNR069C         | BSC5          | -                                                                                                                    | -                                                                                                                    | -                                                                                                                    | Yes                          | Yes                        |
| YKL011C         | CCE1          | <b>9 ± 6.13</b>                                                                                                      | <b>8 ± 10.46</b>                                                                                                     | <b>9 ± 3.70</b>                                                                                                      | yes                          | No                         |
| YML071C         | COG8          | -                                                                                                                    | -                                                                                                                    | -                                                                                                                    | Yes                          | No                         |
| YIL036W         | CST6          | -                                                                                                                    | -                                                                                                                    | -                                                                                                                    | No                           | No                         |
| YHR028C         | DAP2          | -                                                                                                                    | -                                                                                                                    | -                                                                                                                    | No                           | Yes                        |
| YFR044C         | DUG1          | -                                                                                                                    | -                                                                                                                    | -                                                                                                                    | No                           | Yes                        |
| YHR021W-A       | ECM12         | -                                                                                                                    | -                                                                                                                    | -                                                                                                                    | No                           | No                         |
| YJR137C         | ECM17         | -                                                                                                                    | -                                                                                                                    | -                                                                                                                    | Yes                          | No                         |
| YMR031C         | EIS1          | -                                                                                                                    | -                                                                                                                    | -                                                                                                                    | Yes                          | No                         |
| YLR214W         | FRE1          | -                                                                                                                    | -                                                                                                                    | -                                                                                                                    | Yes                          | No                         |
| YOR381W         | FRE3          | -                                                                                                                    | -                                                                                                                    | -                                                                                                                    | Yes                          | No                         |
| YOR324C         | FRT1          | <b>1 ± 0.08</b>                                                                                                      | <b>2 ± 1.01</b>                                                                                                      | <b>1 ± 0.43</b>                                                                                                      | Yes                          | No                         |
| YOL049W         | GSH2          | -                                                                                                                    | -                                                                                                                    | -                                                                                                                    | yes                          | No                         |
| YLL060C         | GTT2          | -                                                                                                                    | -                                                                                                                    | -                                                                                                                    | No                           | No                         |
| YJR069C         | HAM1          | -                                                                                                                    | -                                                                                                                    | -                                                                                                                    | Yes                          | No                         |
| YNL281W         | HCH1          | -                                                                                                                    | -                                                                                                                    | -                                                                                                                    | Yes                          | No                         |
| YLR192C         | HCR1          | -                                                                                                                    | -                                                                                                                    | -                                                                                                                    | Yes                          | Yes                        |

|           |        |                  |                  |                 |     |     |
|-----------|--------|------------------|------------------|-----------------|-----|-----|
| YLL019C   | KNS1   | -                | -                | -               | Yes | No  |
| YDR503C   | LPP1   | -                | -                | -               | Yes | No  |
| YGL197W   | MDS3   | -                | -                | -               | Yes | No  |
| YFR030W   | MET10  | -                | -                | -               | No  | Yes |
| YNL145W   | MFA2   | <b>10 ± 1.49</b> | <b>12 ± 9.58</b> | <b>2 ± 0.08</b> | No  | No  |
| YER028C   | MIG3   | -                | -                | -               | Yes | No  |
| YIRO25W   | MND2   | -                | -                | -               | No  | No  |
| YLR219W   | MSC3   | -                | -                | -               | Yes | No  |
| YMR080C   | NAM7   | -                | -                | -               | Yes | No  |
| YBR212W   | NGR1   | -                | -                | -               | No  | No  |
| YDR456W   | NHX1   | -                | -                | -               | Yes | No  |
| YHR077C   | NMD2   | -                | -                | -               | Yes | No  |
| YOR310C   | NOP58  | -                | -                | -               | No  | Yes |
| YJR062C   | NTA1   | -                | -                | -               | No  | Yes |
| YAL015C   | NTG1   | <b>7 ± 4.11</b>  | <b>11 ± 8.21</b> | <b>2 ± 0.87</b> | Yes | No  |
| YBR025C   | OLA1   | -                | -                | -               | Yes | Yes |
| YIL136W   | OM45   | -                | -                | -               | No  | No  |
| YHL020C   | OPI1   | -                | -                | -               | Yes | No  |
| YLR037C   | PAU23  | -                | -                | -               | No  | Yes |
| YMR231W   | PEP5   | -                | -                | -               | No  | Yes |
| YIL037C   | PRM2   | -                | -                | -               | No  | No  |
| YHR189W   | PTH1   | -                | -                | -               | Yes | Yes |
| YMR274C   | RCE1   | -                | -                | -               | Yes | No  |
| YOR275C   | RIM20  | -                | -                | -               | Yes | No  |
| YDR198C   | RKM2   | <b>9 ± 2.93</b>  | <b>5 ± 0.52</b>  | <b>2 ± 0.85</b> | Yes | No  |
| YPL220W   | RPL1A  | -                | -                | -               | No  | Yes |
| YDL075W   | RPL31A | -                | -                | -               | Yes | No  |
| YDL076C   | RXT3   | -                | -                | -               | No  | No  |
| YAL027W   | SAW1   | -                | -                | -               | No  | Yes |
| YER087C-B | SBH1   | -                | -                | -               | No  | No  |
| YKL148C   | SDH1   | -                | -                | -               | Yes | No  |
| YLL041C   | SDH2   | -                | -                | -               | No  | No  |

|           |           |                  |                  |                 |     |     |
|-----------|-----------|------------------|------------------|-----------------|-----|-----|
| YHR207C   | SET5      | -                | -                | -               | Yes | No  |
| YDR477W   | SNF1      | -                | -                | -               | No  | No  |
| YMR183C   | SSO2      | <b>12 ± 2.54</b> | <b>8 ± 1.47</b>  | <b>3 ± 0.68</b> | Yes | No  |
| YPR095C   | SYT1      | -                | -                | -               | Yes | No  |
| YNL128W   | TEP1      | -                | -                | -               | No  | No  |
| YPR040W   | TIP41     | -                | -                | -               | Yes | No  |
| YER007C-A | TMA20     | -                | -                | -               | No  | Yes |
| YJR014w   | TMA22     | -                | -                | -               | No  | No  |
| YER113C   | TMN3      | -                | -                | -               | No  | No  |
| YOL006C   | TOP1      | -                | -                | -               | Yes | No  |
| YGR072W   | UPF3      | -                | -                | -               | Yes | No  |
| YPR152C   | URN1      | -                | -                | -               | No  | No  |
| YIL056W   | VHR1      | <b>4 ± 1.06</b>  | <b>10 ± 2.57</b> | <b>3 ± 0.52</b> | No  | No  |
| YOR230W   | WTM1      | -                | -                | -               | Yes | No  |
| YLL048C   | YBT1      | -                | -                | -               | Yes | No  |
| YER156C   | YER156C   | -                | -                | -               | Yes | No  |
| YFL043C   | YFL043C   | -                | -                | -               | Yes | No  |
| YGL072C   | YGL072C   | -                | -                | -               | Yes | Yes |
| YGR117C   | YGR117C   | -                | -                | -               | No  | No  |
| YIL032C   | YIL032C   | -                | -                | -               | Yes | No  |
| YLR445W   | YLR445W   | -                | -                | -               | No  | Yes |
| YMR031W-A | YMR031W-A | -                | -                | -               | No  | No  |
| YOR064C   | YNG1      | <b>1 ± 0.03</b>  | <b>2 ± 1.28</b>  | <b>1 ± 0.07</b> | Yes | Yes |
| YNL040W   | YNL040W   | -                | -                | -               | Yes | Yes |
| YNL122C   | YNL122C   | -                | -                | -               | Yes | No  |
| YOR378W   | YOR378W   | -                | -                | -               | Yes | No  |
| YLR120C   | YPS1      | -                | -                | -               | No  | No  |
